# Supplementary material
Source: HighWire-hosted journal article supplement (https://www.annfammed.org/highwire/filestream/15997/field_highwire_adjunct_files/0/BarrySuppFig.pdf)

## Supplemental material for

Barry MJ, Wolff TA, Pbert Let al. Putting evidence into practice: an update on the US Preventive Services Task Force methods for developing recommendations for preventive services. *Ann Fam Med*. 2023;21(2):165-171.

Supplemental Figure 1. Analytic framework for screening for Hepatitis C.

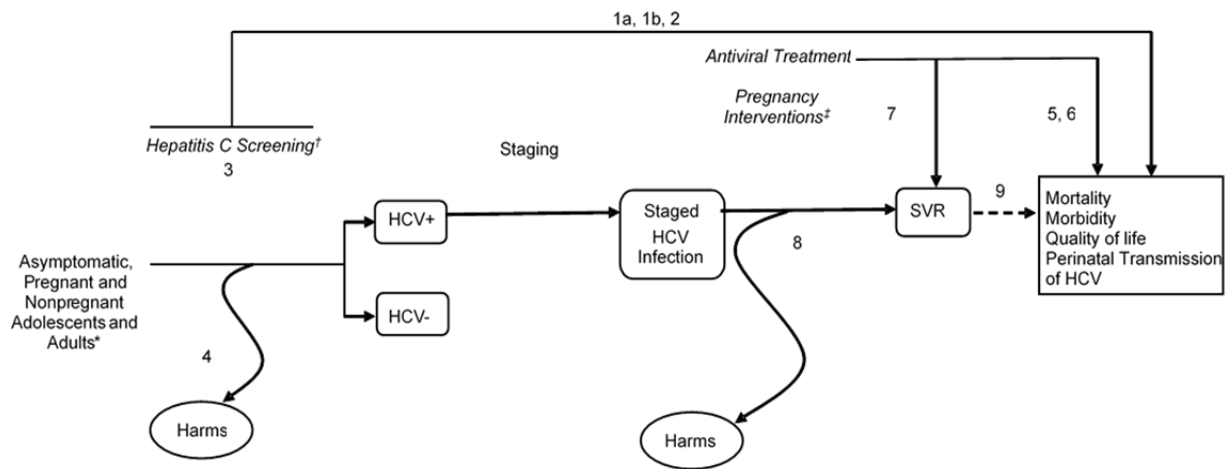

Supplement: BarrySuppFig.pdf [file BarrySuppFig.pdf]
